# Supplementary material
Source: ML conference proceedings conference paper supplement (https://proceedings.mlr.press/v139/inatsu21a.html)

# Target function

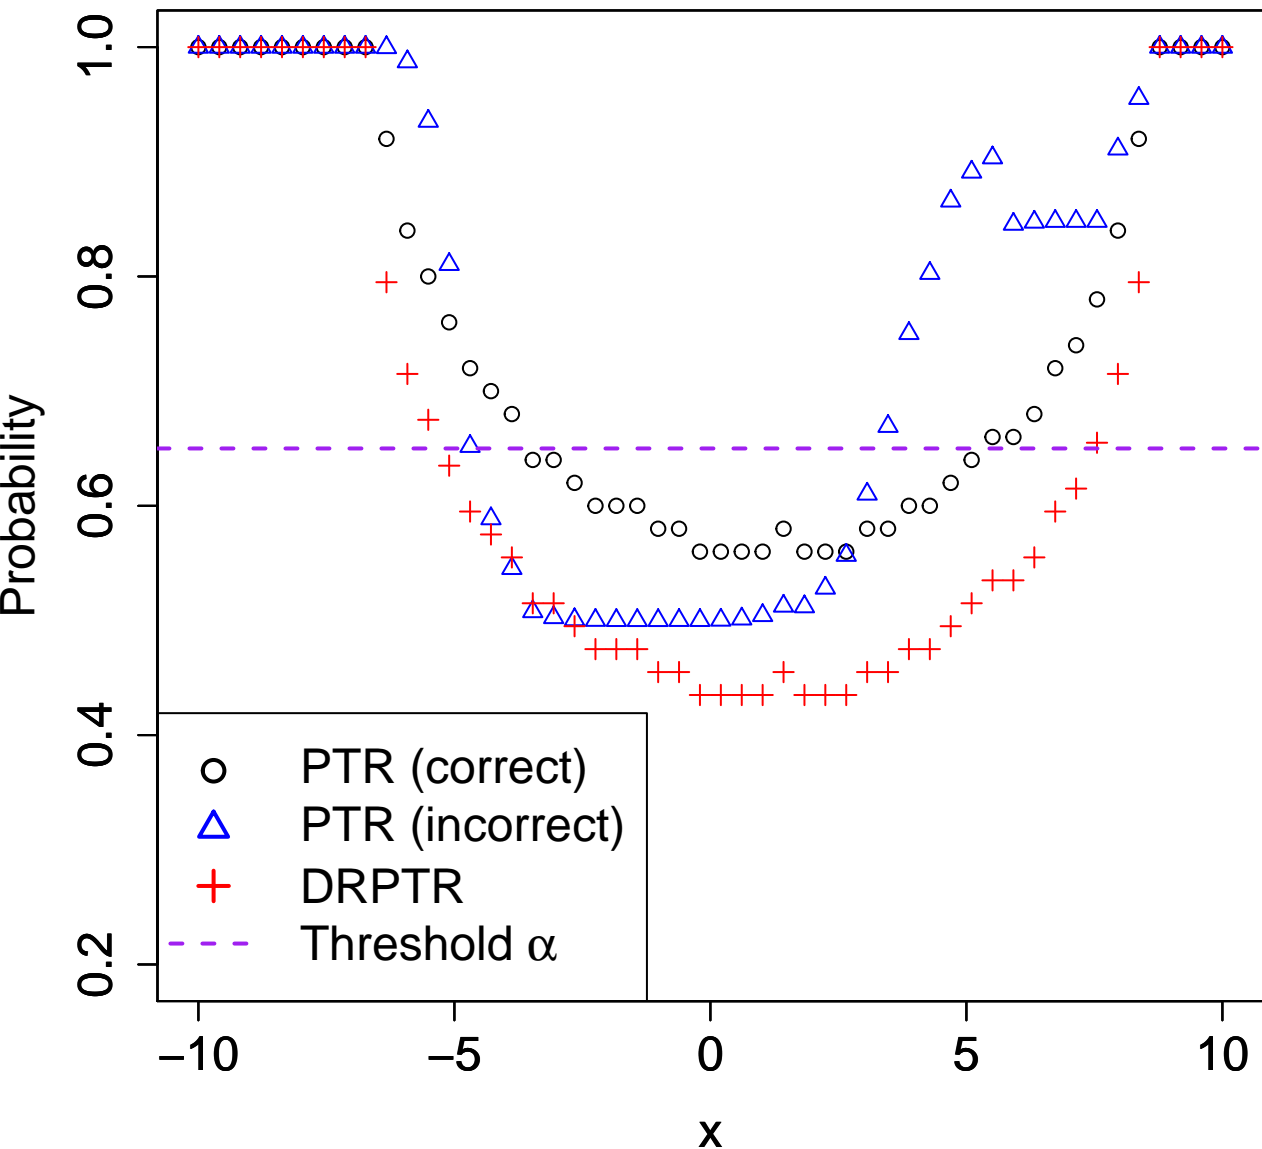

Supplement: Supplementary file 1 [file inatsu21a-supp.zip]

# Precision

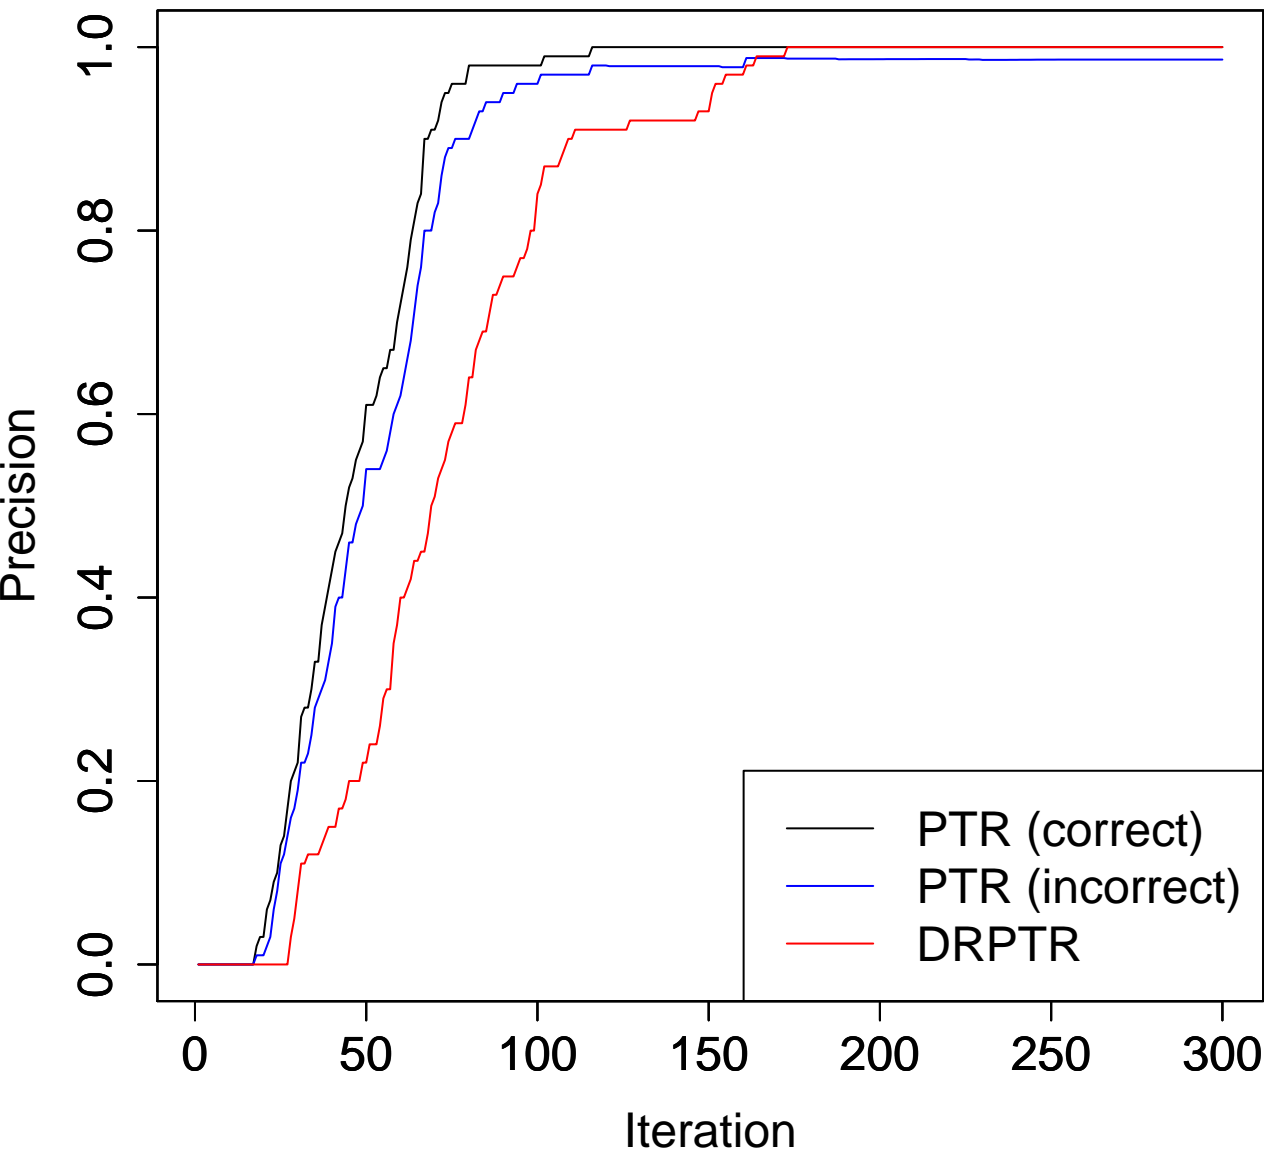

Supplement: Supplementary file 2 [file inatsu21a-supp.zip]

# Recall

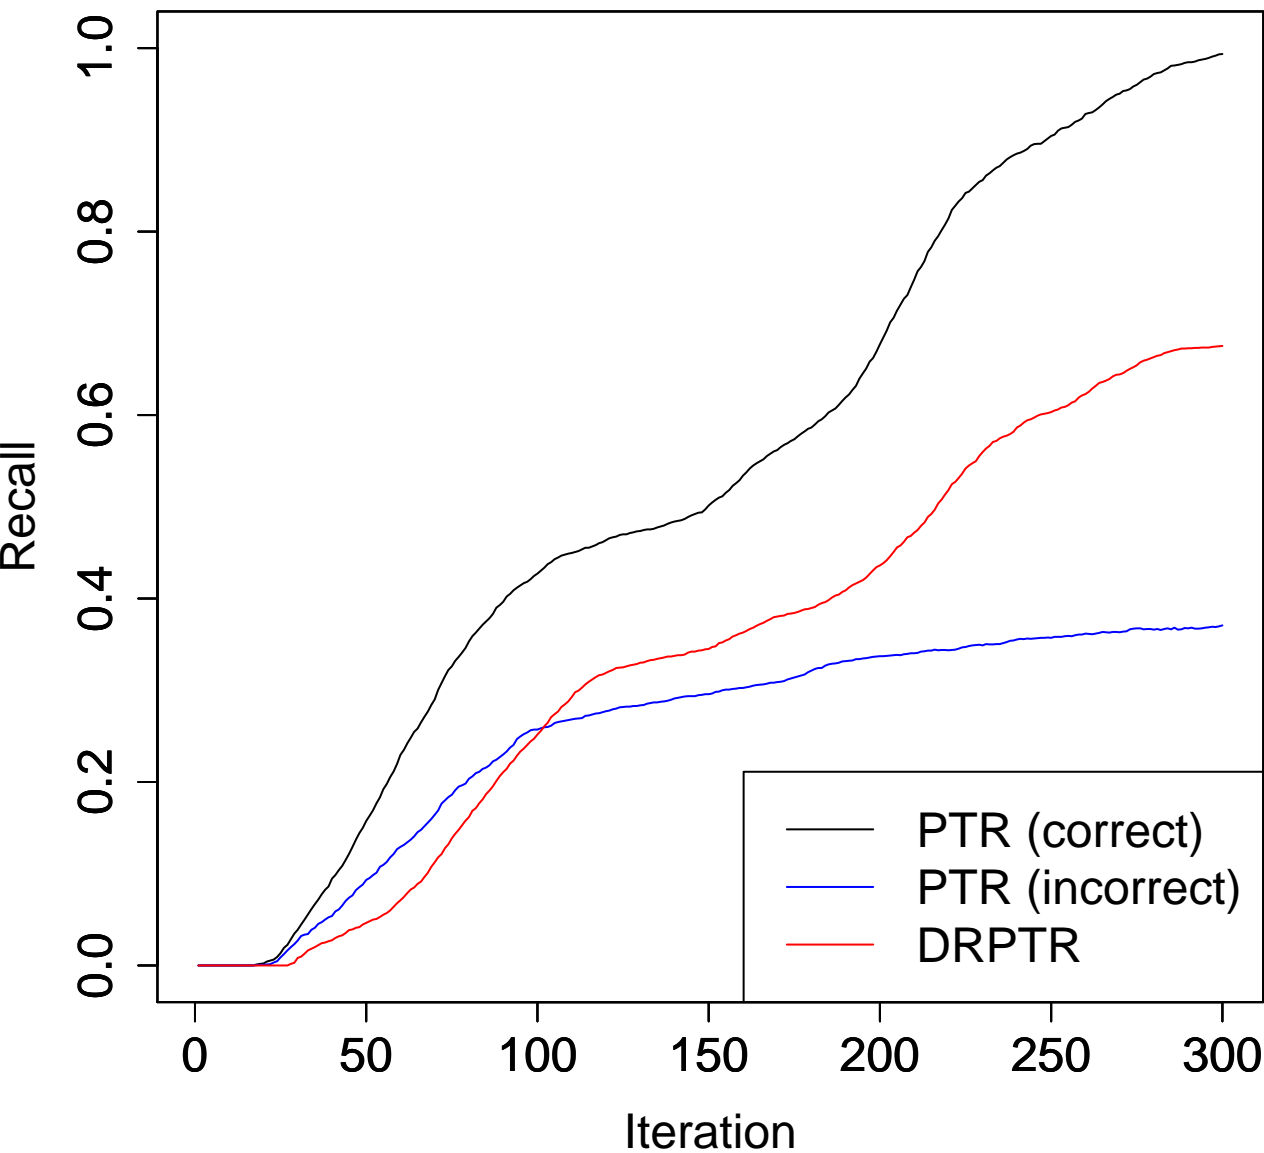

Supplement: Supplementary file 4 [file inatsu21a-supp.zip]
